# Supplementary material for: ZnO@PDA@Ag nanocomposite-mediated delivery of 9-bromonoscapine, an anticancer agent, for enhanced lung cancer therapy
Source: Royal Society of Chemistry journal article supplement (doi:10.1039/d6na00034g), 2026-05-11
Supplement: d6na00034g1.pdf [file d6na00034g1.pdf]

## Supplementary Information

*for the manuscript entitled*

### **ZnO@PDA@Ag Nanocomposite-Mediated Delivery of 9-Bromonoscapine, an Anticancer Agent, for Enhanced Lung Cancer Therapy**

Tanya Goel<sup>a, c</sup>, Shubham Sewariya<sup>b, c</sup>, Manisha Tiwari<sup>a\*</sup>, Ramesh Chandra<sup>a, b, c\*</sup>, Snigdha Singh<sup>b, c\*</sup>

<sup>a</sup> Dr. B. R. Ambedkar Center for Biomedical Research (ACBR), University of Delhi, Delhi-110007, India

<sup>b</sup> Institute of Nano Medical Sciences (INMS), University of Delhi, Delhi-110007, India

<sup>c</sup> Drug Discovery and Development Laboratory, Department of Chemistry, University of Delhi, Delhi-110007, India

\*Corresponding author

**Dr. Snigdha Singh, M. Tech, Ph.D.**

Drug Discovery and Development Laboratory,  
Department of Chemistry, University of Delhi, Delhi-110007  
Email: [ssingh3@chemistry.du.ac.in](mailto:ssingh3@chemistry.du.ac.in)

Institute of Nano Medical Sciences (INMS),  
University of Delhi, Delhi-110007, India  
Email: [deputydirector@inms.du.ac.in](mailto:deputydirector@inms.du.ac.in)

**Prof. Ramesh Chandra, FAMS, FRSC (London)**

Institute of Nano Medical Sciences (INMS),  
University of Delhi, Delhi-110007, India  
Email: [director@inms.du.ac.in](mailto:director@inms.du.ac.in)

Drug Discovery and Development Laboratory,  
Department of Chemistry, University of Delhi, Delhi-110007  
Email: [rchandra@chemistry.du.ac.in](mailto:rchandra@chemistry.du.ac.in)

Dr. B. R. Ambedkar Center for Biomedical Research (ACBR),  
University of Delhi, Delhi-110007, India  
Email: [acbrdu@hotmail.com](mailto:acbrdu@hotmail.com)

**Prof. Manisha Tiwari, Ph.D.**

Dr. B. R. Ambedkar Center for Biomedical Research (ACBR),  
University of Delhi, Delhi-110007, India  
Email: [mtiwari07@gmail.com](mailto:mtiwari07@gmail.com)

## 1. NMR ( $^1\text{H}$ and $^{13}\text{C}$ ) & HR-MS of synthesized 9-Br-Nos drug

20 mg of 9-Br-Nos was weighed and dissolved in 0.5 ml deuterated chloroform ( $\text{CDCl}_3$ ) to prepare the sample for  $^1\text{H}$  and  $^{13}\text{C}$  NMR. The  $^1\text{H}$  and  $^{13}\text{C}$  NMR spectra were recorded in  $\text{CDCl}_3$  on a Bruker Avance Neo NMR at 400 MHz and 100 MHz respectively. The NMR analysis was subsequently done using Mestre Nova software. 9-Br-Nos was obtained as a yellowish-brown solid. Its structure was confirmed by NMR spectroscopy.  **$^1\text{H}$  NMR (400 MHz,  $\text{CDCl}_3$ )  $\delta$ :** 6.95 (d,  $J = 8.3$  Hz, 1H), 6.23 (d,  $J = 8.2$  Hz, 1H), 5.95 (s, 2H), 5.42 (d,  $J = 4.5$  Hz, 1H), 4.26 (d,  $J = 4.6$  Hz, 1H), 4.02 (s, 3H), 3.91 (s, 3H), 3.81 (s, 3H), 2.68 – 2.62 (m, 1H), 2.59 – 2.52 (m, 1H), 2.44 (s, 3H), 2.42 – 2.36 (m, 1H), 1.93 – 1.86 (m, 1H)  **$^{13}\text{C}$  NMR (101 MHz,  $\text{CDCl}_3$ )  $\delta$ :** 166.98, 151.32, 146.81, 145.54, 140.29, 138.99, 133.18, 129.37, 118.68, 118.04, 117.35, 116.48, 100.06, 94.58, 80.29, 80.29, 61.30, 59.94, 58.43, 55.81, 47.43, 44.22, 24.94. HR-MS calculated for  $[\text{C}_{22}\text{H}_{22}\text{BrNO}_7] [\text{M}+\text{Na}]^+$ : 514.04, found: 514.04.

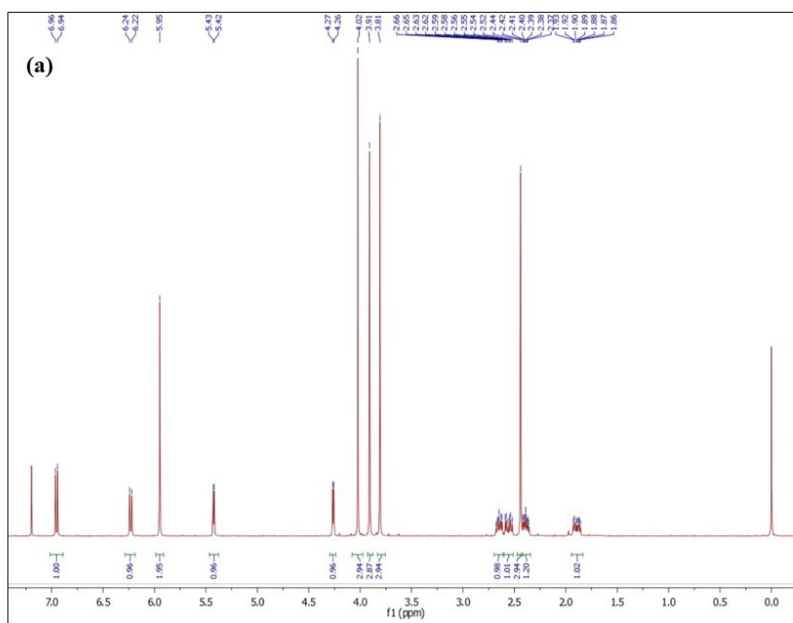

Figure S1.  $^1\text{H}$  NMR of 9-Br-Nos drug

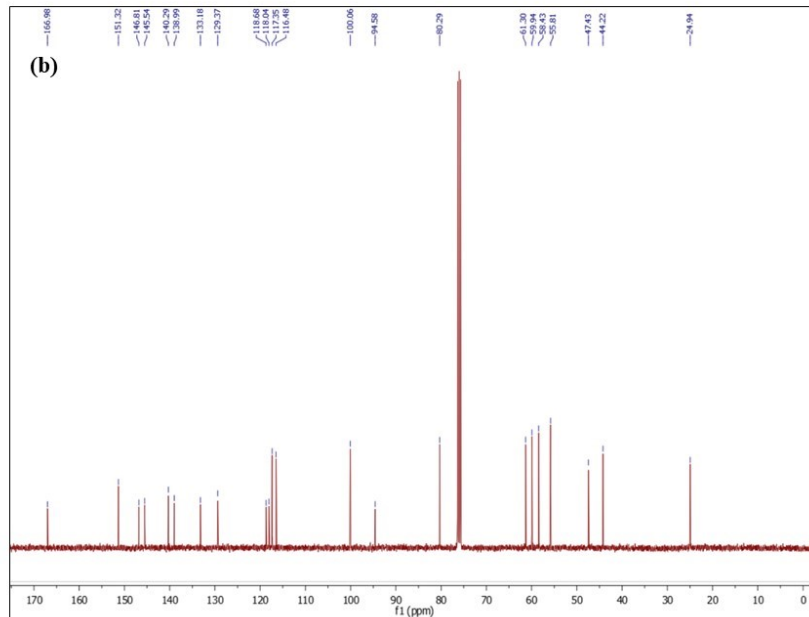

**Figure S2.**  $^{13}\text{C}$  NMR of 9-Br-Nos drug

Compound Spectra (overlaid)

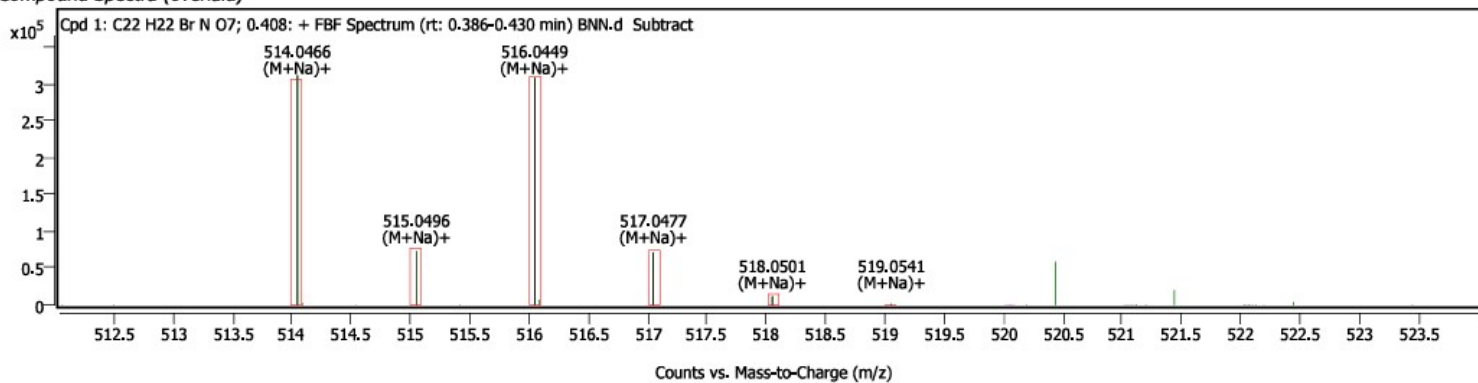

**Figure S3.** Mass Spectra of 9-Br-Nos drug

## 2. Thermogravimetric Analysis (TGA) Analysis

TGA analysis of powdered ZnO@PDA@Ag@9-Br-Nos nanocomposite was performed to assess its thermal stability, weight loss pattern, and to estimate the characteristics of organic coating and drug loading. ‘Shimadzu TG/DTA instrument’ operated in the temperature range from 0 °C to 700 °C at a heating rate of 2 °C per min was used for the analysis.

From the TGA curve of ZnO@PDA@Ag@9-Br-Nos nanocomposite, a continuous weight loss is observed, starting from 0-150 °C (~3-5%) due to the loss of adsorbed water and moisture content from

the surface of the nanocomposite. The major weight loss between 150–500 °C (~20-25%) corresponds to the decomposition of the organic polydopamine (PDA) polymer coating and the loaded drug molecule, 9-Br-Nos. A further gradual weight loss (~10%) is seen from 500-650 °C, attributed to the residual carbonization of PDA fragments and remaining carbon content, while the thermally stable inorganic ZnO and Ag cores remain as residual weight above ~650 °C.<sup>1,2</sup>

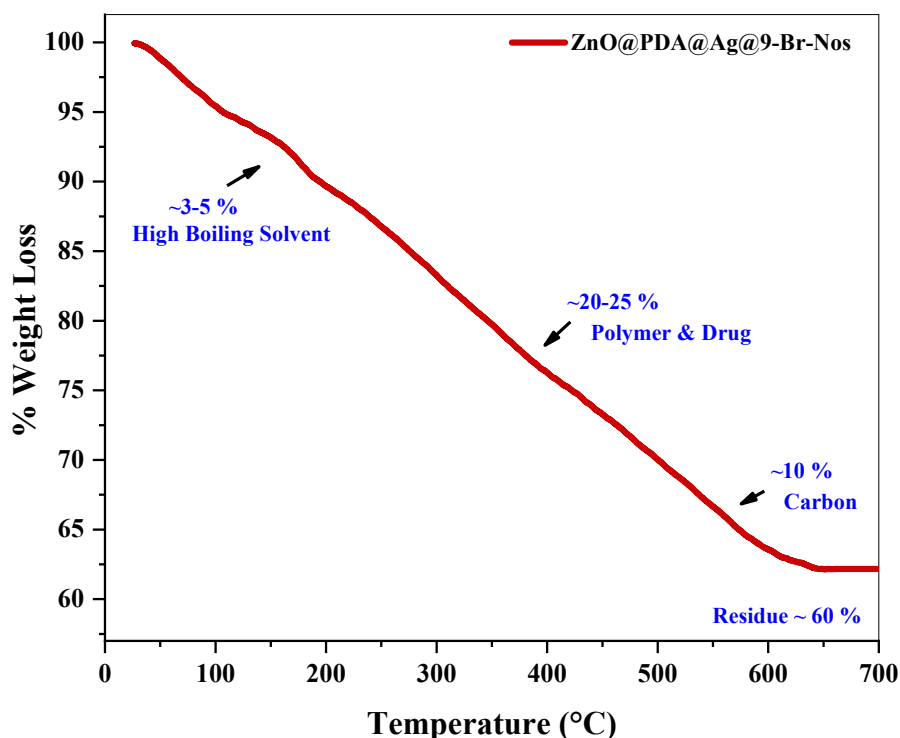

**Figure S4.** TGA analysis of ZnO@PDA@Ag@9-Br-Nos nanocomposite

### 3. Drug Release Kinetic Analysis

To gain deeper insights into the underlying drug-release mechanism, the cumulative release profiles of 9-Br-Nos at pH 5.5 and pH 7.4 were fitted to four widely accepted kinetic models, namely zero-order, first-order, Higuchi, and Korsmeyer-Peppas. Among these, the Korsmeyer-Peppas model exhibited the best goodness-of-fit, with the highest correlation coefficients for both release conditions (pH 5.5:  $R^2 = 0.765$ ; pH 7.4:  $R^2 = 0.683$ ). The diffusion exponent ( $n$ ) obtained from this model was  $<0.45$  in each case, indicating that the release of 9-Br-Nos is predominantly governed by Fickian diffusion.<sup>3</sup> The comparatively higher  $R^2$  value and faster release observed at

pH 5.5 further suggest that the nanocomposite undergoes more efficient drug diffusion under mildly acidic environments, which closely resemble tumor microenvironmental conditions. This pH-responsive enhancement underscores the suitability of the nanocarrier for targeted drug delivery applications in cancer therapy.

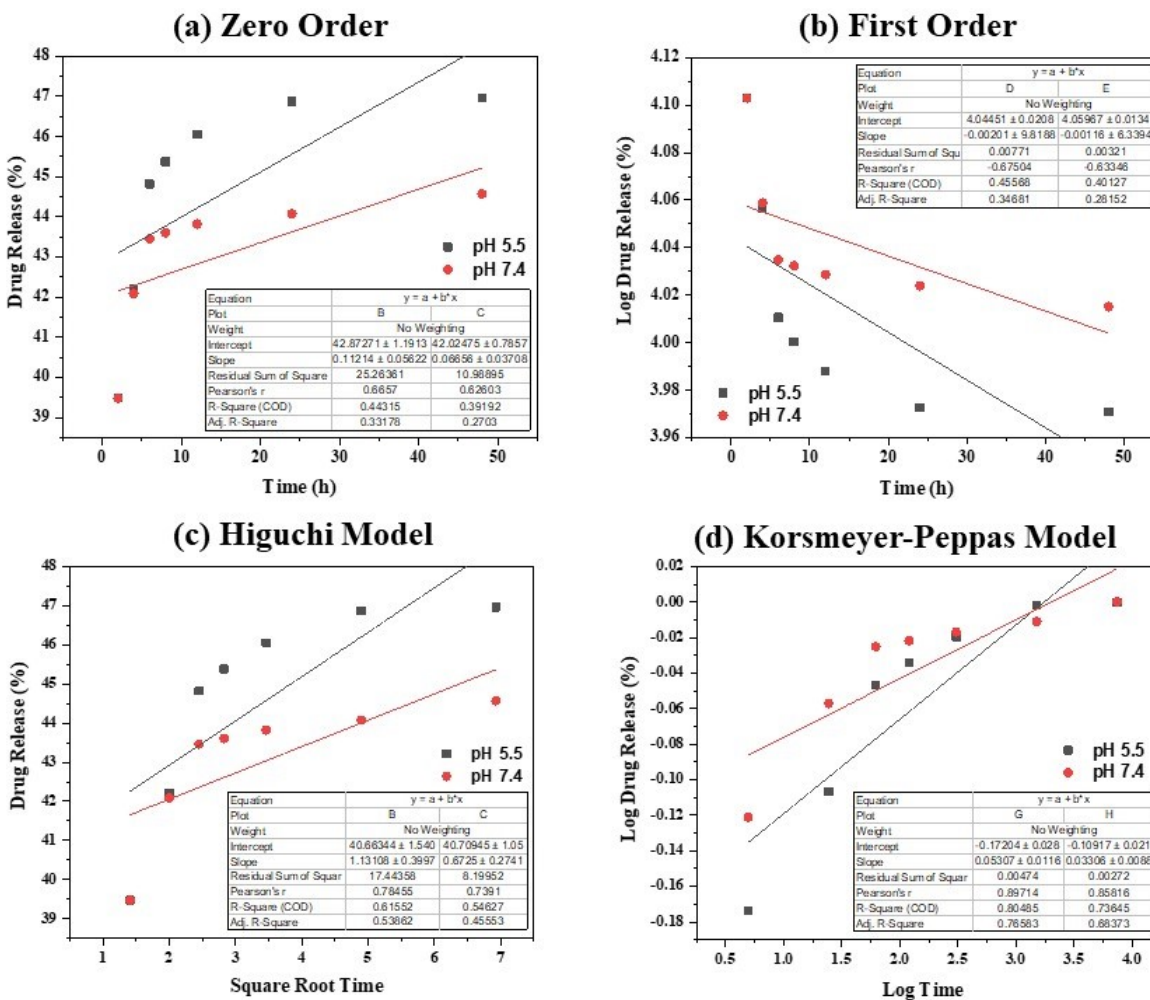

**Figure S5.** Drug Release data fitted to various kinetics models

## References

- (1) Yang, X.-M.; Yin, G.-Z.; Amorós, O. Z.; Hernández, M. A.; de la Vega, J.; Torralba, J. M. Polydopamine Surface Functionalized Submicron ZnO for Broadening the Processing Window of 3D Printable PLA Composites. *J. Polym. Res.* **2023**, *30* (5), 165. <https://doi.org/10.1007/s10965-023-03540-w>.

- (2) Masud, R. A.; Islam, Md. S.; Haque, P.; Khan, M. N. I.; Shahruzzaman, M.; Khan, M.; Takafuji, M.; Rahman, M. M. Preparation of Novel Chitosan/Poly (Ethylene Glycol)/ZnO Bionanocomposite for Wound Healing Application: Effect of Gentamicin Loading. *Materialia* **2020**, *12*, 100785. <https://doi.org/10.1016/j.mtla.2020.100785>.
- (3) Mohammed, W. H.; Ali, W. K.; Al-Awady, M. J. Evaluation of in Vitro Drug Release Kinetics and Antibacterial Activity of Vancomycin HCl-Loaded Nanogel for Topical Application. *J. Pharm. Sci. Res.* **2018**, *10* (11), 2747–2756.
